# Supplementary material for: Assessing the Clinical Meaningfulness of the Alzheimer’s Disease Composite Score (ADCOMS) Tool
Source: PubMed Central journal article supplement — Neurol Ther. 2022 May 5;11(3):1085–100. doi: 10.1007/s40120-022-00352-w (PMC9338189; doi:10.1007/s40120-022-00352-w), 2022-05-05
Supplement: 40120_2022_352_MOESM1_ESM.pdf [file 40120_2022_352_MOESM1_ESM.pdf]

**Supplemental Material for Manuscript:**

**Assessing the Clinical Meaningfulness of the Alzheimer's Disease Composite Score**

**(ADCOMS) Tool**

**Authors and Affiliations:** Amir Abbas Tahami Monfared, MD, PhD<sup>1,2</sup>; William R. Lenderking, PhD<sup>3</sup>;

Yulia Savva, PhD<sup>3</sup>; Mary Kate Ladd, MA<sup>3</sup>; Quanwu Zhang, PhD<sup>1</sup>, for the Alzheimer's Disease

Neuroimaging Initiative\*

<sup>1</sup>Eisai, Inc. Nutley, NJ, USA

<sup>2</sup>McGill University, Epidemiology, Biostatistics, and Occupational Health, Montreal (QC), Canada.

<sup>3</sup>Evidera Inc., Bethesda, MD, USA

**Corresponding Author:**

Amir Abbas Tahami Monfared

Eisai Inc.

200 Metro Blvd., Nutley, NJ 07110

[Amir\\_Tahami@eisai.com](mailto:Amir_Tahami@eisai.com)

**Supplemental Figure 1. PDF Plot of the Change in ADCOMS Score from Baseline to Month 12 by CDR-SOB for MCI Patients**

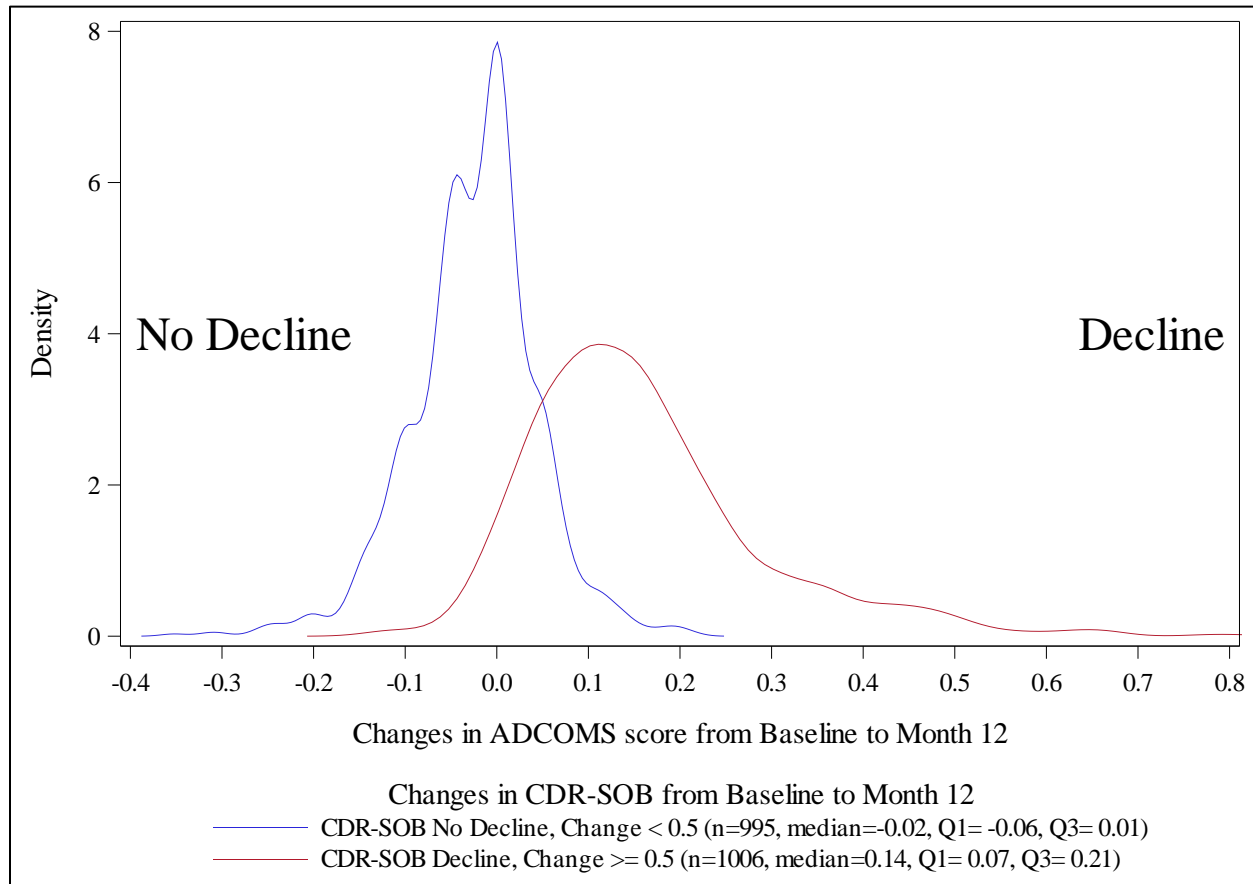

Abbreviations: ADCOMS = Alzheimer's Disease Composite Score; CDR-SOB = Clinical Dementia Rating Scale Sum of Boxes; MCI = mild cognitive impairment; PDF = probability density function

**Supplemental Figure 2. PDF Plot of the Change in ADCOMS Score from Baseline to Month 12 by CDR-SOB for Dementia Patients**

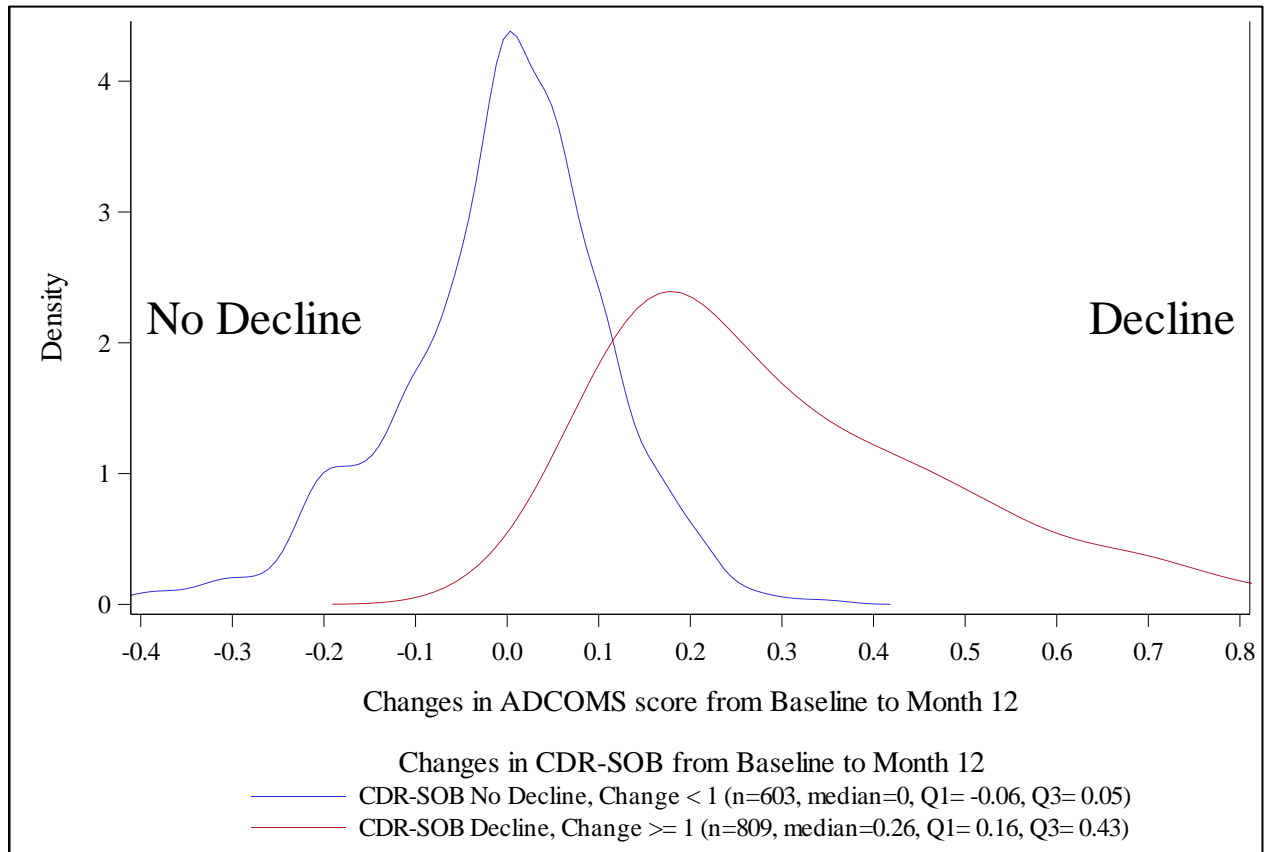

Abbreviations: ADCOMS = Alzheimer's Disease Composite Score; CDR-SOB = Clinical Dementia Rating Scale Sum of Boxes; PDF = probability density function

**Supplemental Table 1. ROC Analysis by APOE Status: Best Youden's Indices**

|                                      | <b>NACC</b> | <b>ADNI</b> | <b>Legacy Dataset</b> |
|--------------------------------------|-------------|-------------|-----------------------|
| <b>MCI</b>                           |             |             |                       |
| APOE $\epsilon$ 4 allele carrier     | 0.02 - 0.03 | 0.08        | 0.05, 0.06, 0.09      |
| APOE $\epsilon$ 4 allele non-carrier | 0.02 - 0.03 | 0.04        | 0.03 – 0.05           |
| <b>Dementia</b>                      |             |             |                       |
| APOE $\epsilon$ 4 allele carrier     | 0.11        | 0.11        | --                    |
| APOE $\epsilon$ 4 allele non-carrier | 0.06, 0.11  | 0.13        | --                    |

Abbreviations: ADNI = Alzheimer's Disease Neuroimaging Initiative; MCI = mild cognitive impairment; NACC = National Alzheimer's Coordinating; ROC = receiver operating characteristic
